# Supplementary material for: Attributable fraction of alcohol consumption on cancer using population-based nationwide cancer incidence and mortality data in the Republic of Korea
Source: PubMed Central journal article supplement (PMC4065076; doi:10.1186/1471-2407-14-420), 2014-06-10
Supplement: 1471-2407-14-420-S1.pdf [file 1471-2407-14-420-S1.pdf]

Supplementary Table 1. Prevalence (%) of alcohol drinking in Korea.

| Year   | Men  | Women | Total |
|--------|------|-------|-------|
| 1989*  | 77.5 | 23.5  | 49.3  |
| 1992*  | 74.6 | 22.6  | 46.9  |
| 1998** | 83.4 | 54.9  | 68.4  |
| 2001** | 82.7 | 59.5  | 69.8  |
| 2005** | 87.2 | 69.8  | 78.5  |

**Notes:** \*Korea National Health Examination Survey. \*\*Korea National Health and Nutrition Examination Survey.

Supplementary Table 2. Daily alcohol consumption (g/day) in Korea.

| Average daily alcohol consumption |              |             |
|-----------------------------------|--------------|-------------|
| Year                              | Men          | Women       |
| <b>1998</b>                       | <b>28.53</b> | <b>6.38</b> |
| 2001                              | 26.68        | 5.70        |
| 2005                              | 25.33        | 7.92        |

**Notes:** Korea National Health and Nutrition Examination Survey.

Supplementary Table 3. Studies included in the meta-analysis for estimating pooled RRs for alcohol drinking on cancer

| Author (year)        | Study period | Study subjects                      |                     |              |                        |                      | Category of Alcohol intake | OR (95% CI)       | Confounding variables considered                                       |
|----------------------|--------------|-------------------------------------|---------------------|--------------|------------------------|----------------------|----------------------------|-------------------|------------------------------------------------------------------------|
|                      |              | Type and source                     | Definition          | No. of cases | No. of controls        | Age mean $\pm$ SD    |                            |                   |                                                                        |
| <b>Oral cavity</b>   |              |                                     |                     |              |                        |                      |                            |                   |                                                                        |
| Jee SH et al (2010)  | 1993-2001    | Korea Medical Insurance Corporation | Cohort study        | 167          | 100                    | Men: 45.2 $\pm$ 11.1 | 0                          | 1.00              | Incidence<br>Adjusted for age, age <sup>2</sup> , smoking and diabetes |
| Re-analysis          |              |                                     | 846,907 men         | 439          | Women: 49.5 $\pm$ 12.1 | 1~24.9               | 1.02 (0.85-1.22)           |                   |                                                                        |
|                      |              |                                     | 482,618 women       | 92           |                        | 25~49.9              | 1.02 (0.79-1.32)           |                   |                                                                        |
|                      |              |                                     | Age:                | 59           |                        | 50~99.9              | 1.27 (0.95-1.72)           |                   |                                                                        |
|                      |              |                                     |                     | 22           |                        | $\geq$ 100           | 1.41 (0.91-2.20)           |                   |                                                                        |
| Jee SH et al (2010)  | 1993-2001    | Korea Medical Insurance Corporation | Cohort study        | 31           | 100                    | Men: 45.2 $\pm$ 11.1 | 0                          | 1.00              | Mortality<br>Adjusted for age, age <sup>2</sup> , smoking and diabetes |
| Re-analysis          |              |                                     | 846,907 men         | 98           | Women: 49.5 $\pm$ 12.1 | 1~24.9               | 1.58(1.05-2.37)            |                   |                                                                        |
|                      |              |                                     | 482,618 women       | 12           |                        | 25~49.9              | 1.33(0.67-2.65)            |                   |                                                                        |
|                      |              |                                     |                     | 11           |                        | 50~99.9              | 2.49(1.22-5.07)            |                   |                                                                        |
|                      |              |                                     |                     | 9            |                        | $\geq$ 100           | 5.84(2.72-12.5)            |                   |                                                                        |
| Choi SY et al (1991) | 1986-1989    | Korea Cancer Center Hospital        | Case/ Control Study | 16           | 100                    | Men: 55.1            | Non-drinker                | 1.00              | Incidence<br>Adjusted for cigarette smoking                            |
|                      |              |                                     | Mean age:           | 9            | 96                     | Case:55.1            | Light                      | 0.59(0.25-1.40)   |                                                                        |
|                      |              |                                     | Case: 55.1(men),    | 45           | 90                     | Control:55.4         | Moderate                   | 3.61(1.82-7.17)   |                                                                        |
|                      |              |                                     | 51.3(women)         | 32           | 46                     | Women Case:51.3      | Medium-heavy               | 4.23(2.13-8.40)   |                                                                        |
|                      |              |                                     |                     | 11           | 7                      | Control:51.1         | Heavy                      | 14.82(5.03-43.67) |                                                                        |
| <b>Pharynx</b>       |              |                                     |                     |              |                        |                      |                            |                   |                                                                        |
| Choi SY et al (1991) | 1986-1989    | Korea Cancer Center Hospital        | Case/ Control study | 16           | 100                    | Men: 53.4            | Non-drinker                | 1.00              | Incidence<br>Adjusted for cigarette smoking                            |
|                      |              |                                     |                     | 20           | 101                    | Case:53.4            | Light                      | 1.22(0.60-2.50)   |                                                                        |
|                      |              |                                     |                     | 44           | 127                    | Control:53.5         | Moderate                   | 2.16(1.13-4.15)   |                                                                        |
|                      |              |                                     |                     | 40           | 63                     | Women Case:49.8      | Medium-heavy               | 4.07(2.11-7.85)   |                                                                        |
|                      |              |                                     |                     | 13           | 8                      | Control:49.7         | Heavy                      | 11.23(4.23-29.83) |                                                                        |
| <b>Esophagus</b>     |              |                                     |                     |              |                        |                      |                            |                   |                                                                        |
| Jee SH et al (2010)  | 1993-2001    | Korea Medical Insurance Corporation | Cohort study        | 196          | 100                    | Men: 45.2 $\pm$ 11.1 | 0                          | 1.00              | Incidence<br>Adjusted for age, age <sup>2</sup> , smoking and diabetes |
| Re-analysis          |              |                                     | 846,907 men         | 854          | Women: 49.5 $\pm$ 12.1 | 1~24.9               | 1.58(1.05-2.37)            |                   |                                                                        |
|                      |              |                                     | 482,618 women       | 179          |                        | 25~49.9              | 1.33(0.67-2.65)            |                   |                                                                        |
|                      |              |                                     |                     | 123          |                        | 50~99.9              | 2.49(1.22-5.07)            |                   |                                                                        |
|                      |              |                                     |                     | 42           |                        | $\geq$ 100           | 5.84(2.72-12.50)           |                   |                                                                        |
| Jee SH et al (2010)  | 1993-2001    | Korea Medical Insurance Corporation | Cohort study        | 128          | 100                    | Men: 45.2 $\pm$ 11.1 | 0                          | 1.00              | Mortality<br>Adjusted for age, age <sup>2</sup> , smoking and diabetes |
| Re-analysis          |              |                                     | 846,907 men         | 548          | Women: 49.5 $\pm$ 12.1 | 1~24.9               | 2.22(1.82-2.70)            |                   |                                                                        |
|                      |              |                                     | 482,618 women       | 95           |                        | 25~49.9              | 3.00(2.28-3.95)            |                   |                                                                        |
|                      |              |                                     |                     | 66           |                        | 50~99.9              | 4.34(3.19-5.91)            |                   |                                                                        |
|                      |              |                                     |                     | 23           |                        | $\geq$ 100           | 4.33(2.76-6.80)            |                   |                                                                        |

Supplementary Table 3. Studies included in the meta-analysis for estimating pooled RRs for alcohol drinking on cancer (continued)

| Author (year)                      | Study period | Study subjects                           |                                              |              |                                                      | Age mean $\pm$ SD | Category of Alcohol intake | OR (95% CI)                                                                                                                                | Confounding variables considered |
|------------------------------------|--------------|------------------------------------------|----------------------------------------------|--------------|------------------------------------------------------|-------------------|----------------------------|--------------------------------------------------------------------------------------------------------------------------------------------|----------------------------------|
|                                    |              | Type and source                          | Definition                                   | No. of cases | No. of controls                                      |                   |                            |                                                                                                                                            |                                  |
| <b>Esophagus</b>                   |              |                                          |                                              |              |                                                      |                   |                            |                                                                                                                                            |                                  |
| Kimm H et al (2010)                | 1992-1995    | Korea Medical Insurance Corporation      | Cohort study<br>782,632 men                  | 185          | 49.0 $\pm$ 12.3                                      | 0                 | 1.00                       | Incidence<br>Adjusted for age, age <sup>2</sup> , Alcohol intake, aspartate aminotransferase (GOT), Body mass index, exercise              |                                  |
|                                    |              |                                          |                                              | 858          | 45.1 $\pm$ 11.1                                      | 1~24.9            | 2.2(1.9-2.6)               |                                                                                                                                            |                                  |
|                                    |              |                                          |                                              | 184          | 42.4 $\pm$ 8.6                                       | 25~49.9           | 3.1(2.5-3.8)               |                                                                                                                                            |                                  |
|                                    |              |                                          |                                              | 112          | 42.0 $\pm$ 8.3                                       | 50~99.9           | 3.8(3.0-4.8)               |                                                                                                                                            |                                  |
|                                    |              |                                          |                                              | 44           | 42.3 $\pm$ 8.2                                       | $\geq$ 100        | 4.1(2.9-5.8)               |                                                                                                                                            |                                  |
| Kimm H et al (2010)                | 1992-1995    | Korea Medical Insurance Corporation      | Cohort study<br>782,632 men                  | 163          | 49.0 $\pm$ 12.3                                      | 0                 | 1.00                       | Mortality<br>Adjusted for age, age <sup>2</sup> , Alcohol intake, aspartate aminotransferase (GOT), Body mass index, exercise              |                                  |
|                                    |              |                                          |                                              | 622          | 45.1 $\pm$ 11.1                                      | 1~24.9            | 1.9(1.6-2.3)               |                                                                                                                                            |                                  |
|                                    |              |                                          |                                              | 110          | 42.4 $\pm$ 8.6                                       | 25~49.9           | 2.7(2.1-3.5)               |                                                                                                                                            |                                  |
|                                    |              |                                          |                                              | 76           | 42.0 $\pm$ 8.3                                       | 50~99.9           | 3.7(2.8-5.0)               |                                                                                                                                            |                                  |
|                                    |              |                                          |                                              | 25           | 42.3 $\pm$ 8.2                                       | $\geq$ 100        | 3.4(2.2-5.3)               |                                                                                                                                            |                                  |
| Yi SW et al (2010)                 | 1985-2005    | KangWha County Cohort Study              | Cohort study<br>2,696 men<br>3,595wo men     | 3            | 55 years or older                                    | None              | 1.00                       | Mortality<br>Adjusted for age, history of chronic disease, smoking habit, ginseng intake, pesticide use, body mass index, education status |                                  |
|                                    |              |                                          |                                              | 3            |                                                      | Low               | 1.04(0.17-6.32)            |                                                                                                                                            |                                  |
|                                    |              |                                          |                                              | 4            |                                                      | Moderate          | 2.45(0.53-11.29)           |                                                                                                                                            |                                  |
|                                    |              |                                          |                                              | 9            |                                                      | High              | 5.62(1.45-21.77)           |                                                                                                                                            |                                  |
| Jung EJ et al (2012)               | 1993-2004    | Korean Multi-center Cancer Cohort (KMCC) | Cohort study<br>15,683 men                   | 3            | 20- (3.4%)                                           | 0                 | 1.00                       | Mortality<br>Adjusted for age, BMI and smoking habit                                                                                       |                                  |
|                                    |              |                                          |                                              | 1            | 30- (10.8%)                                          | 0.01-25g/week     | 2.75(0.25-30.51)           |                                                                                                                                            |                                  |
|                                    |              |                                          |                                              | 1            | 40- (19.3%)                                          | 2.01-108g/week    | 2.77(0.25-30.98)           |                                                                                                                                            |                                  |
|                                    |              |                                          |                                              | 3            | 50- (25.6%)                                          | 108.1-346g/week   | 4.98(0.83-30.04)           |                                                                                                                                            |                                  |
|                                    |              |                                          |                                              | 3            | 60- (28.8%)                                          | >346.01 g/week    | 4.65(0.76-28.39)           |                                                                                                                                            |                                  |
|                                    |              |                                          |                                              |              | 70+ (12.1%)                                          |                   |                            |                                                                                                                                            |                                  |
| <b>Colon</b>                       |              |                                          |                                              |              |                                                      |                   |                            |                                                                                                                                            |                                  |
| Jee SH et al (2010)<br>Re-analysis | 1993-2001    | Korea Medical Insurance Corporation      | Cohort study<br>846,907 men<br>482,618 women | 1.35         | Men:<br>45.2 $\pm$ 11.1<br>Women:<br>49.5 $\pm$ 12.1 | 0                 | 1.00                       | Incidence<br>Adjusted for age, age <sup>2</sup> , smoking and diabetes                                                                     |                                  |
|                                    |              |                                          |                                              | 2635         |                                                      | 1~24.9            | 0.98(0.91-1.05)            |                                                                                                                                            |                                  |
|                                    |              |                                          |                                              | 437          |                                                      | 25~49.9           | 0.76(0.68-0.84)            |                                                                                                                                            |                                  |
|                                    |              |                                          |                                              | 253          |                                                      | 50~99.9           | 0.85(0.74-0.98)            |                                                                                                                                            |                                  |
| Jee SH et al (2010)<br>Re-analysis | 1993-2001    | Korea Medical Insurance Corporation      | Cohort study<br>846,907 men<br>482,618 women | 84           | Men:<br>45.2 $\pm$ 11.1<br>Women:<br>49.5 $\pm$ 12.1 | $\geq$ 100        | 0.84(0.68-1.05)            | Mortality<br>Adjusted for age, age <sup>2</sup> , smoking and diabetes                                                                     |                                  |
|                                    |              |                                          |                                              | 199          |                                                      | 0                 | 1.00                       |                                                                                                                                            |                                  |
|                                    |              |                                          |                                              | 406          |                                                      | 1~24.9            | 1.19(1.00-1.42)            |                                                                                                                                            |                                  |
|                                    |              |                                          |                                              | 50           |                                                      | 25~49.9           | 1.17(0.85-1.61)            |                                                                                                                                            |                                  |
|                                    |              |                                          |                                              | 25           |                                                      | 50~99.9           | 1.21(0.79-1.86)            |                                                                                                                                            |                                  |
| 7                                  | $\geq$ 100   | 0.98(0.46-2.10)                          |                                              |              |                                                      |                   |                            |                                                                                                                                            |                                  |
| Lim HJ et al. (2008)               | 1993-1998    | Korea Medical Insurance Corporation      | Cohort study<br>4,834 men<br>9,470 women     | 74           | 65 years or older                                    | never             | 1.00                       | Incidence<br>Adjusted for age and sex                                                                                                      |                                  |
|                                    |              |                                          |                                              | 14           |                                                      | 0< $\leq$ 24      | 0.62 (0.35-1.12)           |                                                                                                                                            |                                  |
|                                    |              |                                          |                                              | 8            |                                                      | 24< $\leq$ 48     | 1.13 (0.52-2.45)           |                                                                                                                                            |                                  |
|                                    |              |                                          |                                              | 2            |                                                      | 48< $\leq$ 72     | 1.07 (0.26-4.48)           |                                                                                                                                            |                                  |
|                                    |              |                                          |                                              | 8            |                                                      | 72<               | 1.15 (0.28-4.72)           |                                                                                                                                            |                                  |

Supplementary Table 3. Studies included in the meta-analysis for estimating pooled RRs for alcohol drinking on cancer (continued)

| Author (year)                         | Study period | Study subjects                                                |                                                                                                       |                 |                    | Age<br>mean ±SD                                | Category of<br>Alcohol intake | OR<br>(95% CI)  | Confounding variables<br>considered                                                                                                                 |
|---------------------------------------|--------------|---------------------------------------------------------------|-------------------------------------------------------------------------------------------------------|-----------------|--------------------|------------------------------------------------|-------------------------------|-----------------|-----------------------------------------------------------------------------------------------------------------------------------------------------|
|                                       |              | Type and source                                               | Definition                                                                                            | No. of<br>cases | No. of<br>controls |                                                |                               |                 |                                                                                                                                                     |
| <b>Colon</b>                          |              |                                                               |                                                                                                       |                 |                    |                                                |                               |                 |                                                                                                                                                     |
| Kim J et al<br>(2009)                 |              | Two university<br>hospitals                                   | Case/ Control<br>study                                                                                | 101             | 96                 | 30-79 years                                    | <5                            | 1.00            | Incidence, Men<br>Crude OR                                                                                                                          |
|                                       |              |                                                               |                                                                                                       | 97              | 82                 |                                                | 5-29                          | 1.12(0.73-1.72) |                                                                                                                                                     |
|                                       |              |                                                               |                                                                                                       | 163             | 92                 |                                                | ≥30                           | 1.68(1.13-2.50) |                                                                                                                                                     |
|                                       |              |                                                               |                                                                                                       | 217             | 228                | 30-79 years                                    | <5                            | 1.00            |                                                                                                                                                     |
|                                       |              |                                                               |                                                                                                       | 16              | 9                  |                                                | 5-29                          | 1.87(0.76-4.90) |                                                                                                                                                     |
| 2                                     | 2            | ≥-2                                                           | 1.05(0.08-14.61)                                                                                      |                 |                    |                                                |                               |                 |                                                                                                                                                     |
| Yi SW et al<br>(2010)                 | 1985-2005    | KangWha County<br>Cohort Study                                | Cohort study<br>2,696 men<br>3,595wo men                                                              | 6               |                    | 55 years or<br>older                           | None                          | 1.00            | Mortality<br>Adjusted for age, history of chronic<br>disease, smoking habit, ginseng<br>intake, pesticide use, body mass<br>index, education status |
|                                       |              |                                                               |                                                                                                       | 8               |                    |                                                | Low                           | 1.57(0.50-4.91) |                                                                                                                                                     |
|                                       |              |                                                               |                                                                                                       | 4               |                    |                                                | Moderate                      | 1.33(0.37-4.82) |                                                                                                                                                     |
|                                       |              |                                                               |                                                                                                       | 8               |                    |                                                | High                          | 2.61(0.88-7.78) |                                                                                                                                                     |
| <b>Liver</b>                          |              |                                                               |                                                                                                       |                 |                    |                                                |                               |                 |                                                                                                                                                     |
| Jee SH et al<br>(2010)<br>Re-analysis | 1993-2001    | Korea Medical<br>Insurance<br>Corporation                     | Cohort study<br>846,907 men<br>482,618 women                                                          | 1326            |                    | Men:<br>45.2 ± 11.1<br>Women:<br>49.5 ± 12.1   | 0                             | 1.00            | Incidence<br>Adjusted for age, age <sup>2</sup> ,<br>smoking and diabetes                                                                           |
|                                       |              |                                                               |                                                                                                       | 4608            |                    |                                                | 1~24.9                        | 0.79(0.74-0.84) |                                                                                                                                                     |
|                                       |              |                                                               |                                                                                                       | 907             |                    |                                                | 25~49.9                       | 0.88(0.80-0.96) |                                                                                                                                                     |
|                                       |              |                                                               |                                                                                                       | 485             |                    |                                                | 50~99.9                       | 0.93(0.84-1.04) |                                                                                                                                                     |
|                                       |              |                                                               |                                                                                                       | 215             |                    |                                                | ≥100                          | 1.27(1.09-1.48) |                                                                                                                                                     |
| Jee SH et al<br>(2010)<br>Re-analysis | 1993-2001    | Korea Medical<br>Insurance<br>Corporation                     | Cohort study<br>846,907 men<br>482,618 women                                                          | 766             |                    | Men:<br>45.2 ± 11.1<br>Women:<br>49.5 ± 12.1   | 0                             | 1.00            | Morality<br>Adjusted for age, age <sup>2</sup> ,<br>smoking and diabetes                                                                            |
|                                       |              |                                                               |                                                                                                       | 1757            |                    |                                                | 1~24.9                        | 1.03(0.95-1.12) |                                                                                                                                                     |
|                                       |              |                                                               |                                                                                                       | 454             |                    |                                                | 25~49.9                       | 1.12(1.00-1.26) |                                                                                                                                                     |
|                                       |              |                                                               |                                                                                                       | 242             |                    |                                                | 50~99.9                       | 1.17(1.01-1.35) |                                                                                                                                                     |
|                                       |              |                                                               |                                                                                                       | 114             |                    |                                                | ≥100                          | 1.63(1.33-1.98) |                                                                                                                                                     |
| Shin HR et al<br>(2004)               | 1990-1993    | Hospital-based<br>(Inje University<br>Pusan Paik<br>Hospital) | Cases: newly<br>histologically<br>confirmed<br>cases<br>Controls:<br>patients of the<br>same hospital | 79              | 167                | Case:<br>53.0 ± 8.5<br>Controls:<br>53.1 ± 8.5 | no                            | 1.00            | Incidence, HCC cases<br>Matched for sex and age (±4yrs)<br><br>CLG cases<br>Matched for sex and age (±4yrs)                                         |
|                                       |              |                                                               |                                                                                                       | 90              | 194                |                                                | moderate                      | 0.9 (0.7-1.4)   |                                                                                                                                                     |
|                                       |              |                                                               |                                                                                                       | 34              | 45                 |                                                | heavy                         | 1.8 (1.0-3.2)   |                                                                                                                                                     |
|                                       |              |                                                               |                                                                                                       | 18              | 167                |                                                | no                            | 1.00            |                                                                                                                                                     |
|                                       |              |                                                               |                                                                                                       | 14              | 194                |                                                | moderate                      | 0.6 (0.3-1.4)   |                                                                                                                                                     |
|                                       |              |                                                               |                                                                                                       | 9               | 45                 |                                                | heavy                         | 1.8 (0.8-4.4)   |                                                                                                                                                     |
| Yi SW et al<br>(2010)                 | 1985-2005    | KangWha County<br>Cohort Study                                | Cohort study<br>2,696 men<br>3,595wo men                                                              | 13              |                    | 55 years or<br>older                           | None                          | 1.00            | Mortality<br>Adjusted for age, history of chronic<br>disease, smoking habit, ginseng<br>intake, pesticide use, body mass<br>index, education status |
|                                       |              |                                                               |                                                                                                       | 8               |                    |                                                | Low                           | 0.91(0.38-2.22) |                                                                                                                                                     |
|                                       |              |                                                               |                                                                                                       | 8               |                    |                                                | Moderate                      | 0.94(0.38-2.28) |                                                                                                                                                     |
|                                       |              |                                                               |                                                                                                       | 8               |                    |                                                | High                          | 0.79(0.31-2.01) |                                                                                                                                                     |

Supplementary Table 3. Studies included in the meta-analysis for estimating pooled RRs for alcohol drinking on cancer (continued)

| Author (year)                         | Study period | Study subjects                                                            |                                                                                                       |                                              |                                            | Age<br>mean $\pm$ SD                                                            | Category of<br>Alcohol intake                                              | OR<br>(95% CI)                                                                                                                    | Incidence/Mortality<br>Confounding variables<br>considered                                                                                                                                                                                                                                                                   |
|---------------------------------------|--------------|---------------------------------------------------------------------------|-------------------------------------------------------------------------------------------------------|----------------------------------------------|--------------------------------------------|---------------------------------------------------------------------------------|----------------------------------------------------------------------------|-----------------------------------------------------------------------------------------------------------------------------------|------------------------------------------------------------------------------------------------------------------------------------------------------------------------------------------------------------------------------------------------------------------------------------------------------------------------------|
|                                       |              | Type and source                                                           | Definition                                                                                            | No. of<br>cases                              | No. of<br>controls                         |                                                                                 |                                                                            |                                                                                                                                   |                                                                                                                                                                                                                                                                                                                              |
| <b>Larynx</b>                         |              |                                                                           |                                                                                                       |                                              |                                            |                                                                                 |                                                                            |                                                                                                                                   |                                                                                                                                                                                                                                                                                                                              |
| Jee SH et al<br>(2010)<br>Re-analysis | 1993-2001    | Korea Medical<br>Insurance<br>Corporation                                 | Cohort study<br>846,907 men<br>482,618<br>women                                                       | 176<br>530<br>116<br>67<br>23                |                                            | Men:<br>45.2 $\pm$ 11.1<br>Women:<br>49.5 $\pm$ 12.1                            | 0<br>1~24.9<br>25~49.9<br>50~99.9<br>$\geq$ 100                            | 1.00<br>1.17(0.98-1.38)<br>1.21(0.96-1.53)<br>1.37(1.03-1.81)<br>1.39(0.90-2.15)                                                  | Incidence<br>Adjusted for age, age <sup>2</sup> ,<br>smoking and diabetes                                                                                                                                                                                                                                                    |
| Jee SH et al<br>(2010)<br>Re-analysis | 1993-2001    | Korea Medical<br>Insurance<br>Corporation                                 | Cohort study<br>846,907 men<br>482,618<br>women                                                       | 69<br>180<br>25<br>16<br>8                   |                                            | Men:<br>45.2 $\pm$ 11.1<br>Women:<br>49.5 $\pm$ 12.1                            | 0<br>1~24.9<br>25~49.9<br>50~99.9<br>$\geq$ 100                            | 1.00<br>1.34(1.01-1.77)<br>1.54(0.96-2.48)<br>2.06(1.18-3.62)<br>2.96(1.40-6.22)                                                  | Mortality<br>Adjusted for age, age <sup>2</sup> ,<br>smoking and diabetes                                                                                                                                                                                                                                                    |
| Choi SY et al<br>(1991)               | 1986-1989    | Korea Cancer<br>Center Hospital                                           | Case/ Control<br>study                                                                                | 16<br>20<br>44<br>40<br>13                   | 100<br>101<br>127<br>63<br>8               | Men:<br>Case:58.3<br>Control:58.<br>8<br>Women<br>Case:56.0<br>Control:56.<br>8 | Non-drinker<br>Light<br>Moderate<br>Medium-<br>heavy<br>Heavy              | 1.00<br>1.22(0.60-2.50)<br>2.16(1.13-4.15)<br>4.07(2.11-7.85)<br>11.23(4.23-29.83)                                                | Incidence<br>Adjusted for age, cigarette smoking                                                                                                                                                                                                                                                                             |
| <b>Breast</b>                         |              |                                                                           |                                                                                                       |                                              |                                            |                                                                                 |                                                                            |                                                                                                                                   |                                                                                                                                                                                                                                                                                                                              |
| Do MH et al.<br>(2003)                | 1998-1999    | Hospital -based<br>(Hanyang and<br>Soonchunhyang<br>University Hospitals) | Cases: newly<br>histologically<br>confirmed<br>cases<br>Controls:<br>patients of the<br>same hospital | 14<br>21<br>14<br>11<br>10<br>15<br>11<br>12 | 8<br>19<br>20<br>20<br>14<br>19<br>12<br>9 | 20-69 years                                                                     | none<br><45<br>45-149<br>$\geq$ 150<br>none<br><45<br>45-149<br>$\geq$ 150 | 1.00<br>1.30 (0.72-2.66)<br>0.97 (0.64-3.10)<br>1.49 (0.92-3.28)<br>1.00<br>1.11(0.34-3.64)<br>1.28(0.35-4.73)<br>1.87(0.49-7.20) | Incidence, Premenopausal<br>Adjusted for age, age at menarche,<br>family history of breast cancer,<br>pregnancy, experience of breast<br>feeding,<br>total periods of breastfeeding, total<br>energy intake, fiber intake, vitamin<br>A, C, E intake, and vitamin<br>supplement use<br>Incidence, Postmenopausal<br>Crude OR |

Supplementary Table 3. Studies included in the meta-analysis for estimating pooled RRs for alcohol drinking on cancer (continued)

| Author (year)                     | Study period | Study subjects                    |                                                                                                                                 |              |                 | Category of Alcohol intake | OR (95% CI)                                                       | Confounding variables considered                                                                                                                                                                       |
|-----------------------------------|--------------|-----------------------------------|---------------------------------------------------------------------------------------------------------------------------------|--------------|-----------------|----------------------------|-------------------------------------------------------------------|--------------------------------------------------------------------------------------------------------------------------------------------------------------------------------------------------------|
|                                   |              | Type and source                   | Definition                                                                                                                      | No. of cases | No. of controls |                            |                                                                   |                                                                                                                                                                                                        |
| <b>Breast</b>                     |              |                                   |                                                                                                                                 |              |                 |                            |                                                                   |                                                                                                                                                                                                        |
| Kim H et al (2012)<br>Re-analysis |              | Seoul Breast Cancer Study (SeBCS) | Cases: newly diagnosed histologically breast cancer cases<br>Controls: breast cancer-free population who lived in the community | 4,508        | 4,693           | Beta<br>Se(beta)           | 0.00825* (0.00872)<br>Log(RR) per 10 gram/day alcohol consumption | Incidence<br>Adjusted for age, education, family history, age at menarche, menopausal status, menopausal age, breastfeeding experiences and duration, oral contraceptive use, HRT, BMI, smoking status |

\* log(OR) per 10g/day alcohol consumption (standard error).

**Abbreviations:** OR, odds ratio; CI, confidence interval; HBsAg, hepatitis B surface antigen; anti-HCV, antibodies against hepatitis C virus.
